# Supplementary material for: Reductions by titanium(ii) as catalyzed by titanium(iv)
Source: Royal Society of Chemistry journal article supplement (doi:10.1039/b510212j), 2005-11-18
Supplement: b510212j.pdf [file b510212j.pdf]

Tables S-1 to S-3. Detailed kinetic data for redox reactions.

S-1

Table S-1. Reduction of  $[(\text{NH}_3)_5\text{Co}(\text{C}_2\text{O}_4)]^+$  by titanium(II): kinetic data<sup>a</sup>

| $[\text{Co}^{\text{III}}]$ , mM | $[\text{Ti}(\text{II})]$ , mM | $[\text{H}^+]$ , M | $10^2 k_2$ , s <sup>-1</sup> <sup>b</sup> |
|---------------------------------|-------------------------------|--------------------|-------------------------------------------|
| 0.60                            | 40                            | 0.50               | 7.8 (7.2)                                 |
| 0.80                            | 30                            | 0.50               | 5.1 (5.4)                                 |
| 0.90                            | 25                            | 0.50               | 4.9 (4.5)                                 |
| 1.00                            | 20                            | 0.50               | 3.4 (3.6)                                 |
| 0.60                            | 15.0                          | 0.50               | 2.5 (2.7)                                 |
| 1.40                            | 8.0                           | 0.50               | 1.32 (1.44)                               |
| 1.00                            | 8.0                           | 0.20               | 9.2 (9.0)                                 |
| 1.00                            | 8.0                           | 0.30               | 3.2 (4.0)                                 |
| 1.40                            | 8.0                           | 0.40               | 1.91 (2.25)                               |
| 1.50                            | 8.0                           | 0.60               | 0.85 (1.00)                               |
| 1.50                            | 8.0                           | 0.70               | 0.78 (0.73)                               |

---

<sup>a</sup>Reactions at 22 °C,  $\mu = 1.0$  M ( $\text{CF}_3\text{SO}_3\text{H}/\text{CF}_3\text{SO}_3\text{Na}$ ),  $\lambda = 504$  nm. <sup>b</sup>First order rate constants; parenthetical values were obtained calculated from eq. (4) in text, taking  $k$  as  $0.45 \text{ Ms}^{-1}$ .

Table S-2. Reductions of  $[(\text{NH}_3)_5\text{BrCo}]^{2+}$  by Ti(II) as catalyzed by Ti(IV). Initial rates.<sup>a</sup>

| [Ti(II)], mM | [Ti(IV)], mM | [H <sup>+</sup> ], M | $10^6(\text{rate}), \text{Ms}^{-1}$ <sup>b</sup> |
|--------------|--------------|----------------------|--------------------------------------------------|
| 40           | 40           | 0.70                 | 11.0 (13.4)                                      |
| 25           | 25           | 0.70                 | 5.3 (5.3)                                        |
| 20           | 20           | 0.70                 | 3.8 (3.4)                                        |
| 16.0         | 16           | 0.70                 | 2.6 (2.2)                                        |
| 12.0         | 12.0         | 0.70                 | 1.5 (1.2)                                        |
| 12.0         | 24           | 0.70                 | 2.4 (2.4)                                        |
| 12.0         | 36           | 0.70                 | 3.6 (3.6)                                        |
| 12.0         | 48           | 0.70                 | 4.5 (4.8)                                        |
| 12.0         | 60           | 0.70                 | 5.7 (6.1)                                        |
| 12.0         | 72           | 0.70                 | 7.6 (7.3)                                        |
| 25           | 25           | 0.40                 | 5.5 (5.3)                                        |
| 25           | 25           | 0.60                 | 4.9 (5.3)                                        |
| 25           | 25           | 0.90                 | 4.7 (5.3)                                        |

---

<sup>a</sup>Reactions at 22 °C,  $\mu = 1.0 \text{ M}$  ( $\text{NaClO}_4/\text{HClO}_4/\text{CF}_3\text{SO}_3\text{H}$ );  $\lambda = 551 \text{ nm}$ .  $[\text{Co(III)}] = 1\text{-}2 \text{ mM}$ . <sup>b</sup>Initial rates; parenthetical values obtained from rate law (5), taking  $k$  as  $8.4 \times 10^{-3} \text{ M}^{-1}\text{s}^{-1}$ .

Table S-3. Reductions of  $[(\text{NH}_3)_5\text{CoI}]^{2+}$  by Ti(II) as catalyzed by Ti(IV). Initial rates<sup>a</sup>

| [Co(III)], mM | Ti(II), mM | [Ti(IV)], mM | [H <sup>+</sup> ], M | $10^6(\text{rate}), \text{Ms}^{-1}$ <sup>b</sup> |
|---------------|------------|--------------|----------------------|--------------------------------------------------|
| 3.2           | 25         | 25           | 0.70                 | 5.6 (5.6)                                        |
| 4.0           | 20         | 20           | 0.70                 | 4.3 (3.6)                                        |
| 2.6           | 16.0       | 16.0         | 0.70                 | 2.1 (2.3)                                        |
| 0.70          | 12.0       | 12.0         | 0.70                 | 1.5 (1.3)                                        |
| 2.8           | 12.0       | 24           | 0.70                 | 3.2 (2.6)                                        |
| 2.2           | 12.0       | 36           | 0.70                 | 4.6 (3.9)                                        |
| 1.70          | 12.0       | 48           | 0.70                 | 5.2 (5.2)                                        |
| 1.70          | 12.0       | 60           | 0.70                 | 6.7 (6.5)                                        |
| 1.70          | 12.0       | 72           | 0.70                 | 7.7 (7.8)                                        |
| 0.50          | 32         | 32           | 0.20                 | 7.0 (9.2)                                        |

---

<sup>a</sup>Reactions at 22 °C,  $\mu = 1.0 \text{ M}$  ( $\text{NaClO}_4/\text{HClO}_4/\text{CF}_3\text{SO}_3\text{H}$ );  $\lambda = 580 \text{ nm}$ . <sup>b</sup>Initial rates; parenthetical values were obtained from rate law (5), taking  $k$  as  $9.0 \times 10^{-3} \text{ M}^{-1}\text{s}^{-1}$ .
